# Supplementary material for: SMDT1 variants impair EMRE-mediated mitochondrial calcium uptake in patients with muscle involvement
Source: bioRxiv or medRxiv preprint supplement (doi:10.1101/2022.10.31.514480), 2022-10-31
Supplement: Supplementary file [file media-1.pdf]

**SUPPLEMENTARY MATERIAL****Supplementary Table 1: Filtering of whole exome sequencing data of P1-EMRE and P2-EMRE**

| Patient                                               | P1-EMRE                                  | P2-EMRE                                                                      |
|-------------------------------------------------------|------------------------------------------|------------------------------------------------------------------------------|
| DNA-no.                                               | DNA16-07061B                             | DNA15-10039B                                                                 |
| Variants                                              | 138252                                   | 120936                                                                       |
| Allele frequency <1%*                                 | 11901                                    | 3486                                                                         |
| Exonic/splice site variants                           | 2495                                     | 842                                                                          |
| Non-synonymous variants                               | 1532                                     | 531                                                                          |
| Variants compatible with recessive inheritance        | 431                                      | 87                                                                           |
| Homozygous variants                                   | 9                                        | 26                                                                           |
| Variants previously assessed as (likely) benign       | 8                                        | 22                                                                           |
| Software scores predicting pathogenicity <sup>#</sup> | 1                                        | 2                                                                            |
|                                                       | <b>1 class 4 variant in <i>SMDT1</i></b> | <b>1 class 3 variant in <i>SMDT1</i></b><br>1 class 3 variant in <i>PISD</i> |
|                                                       | mean coverage: 144-fold                  | mean coverage: 96-fold                                                       |

\*Allele frequency data in GnomAD

<sup>#</sup>Variation analysis software used: PhyloP, CADD, SIFT, Grantham

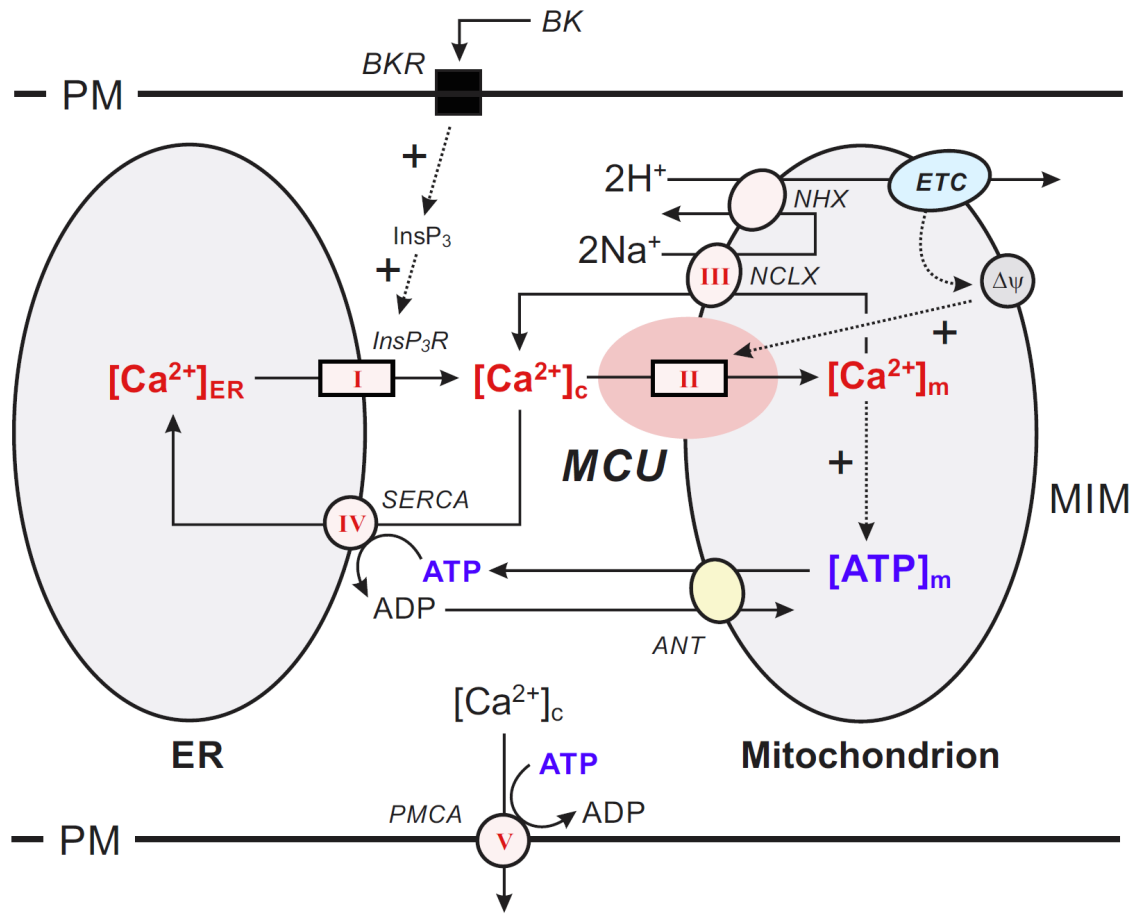

**Supplementary Figure 1: Calcium handling in hormone-stimulated PHSFs.** Stimulation of primary human skin fibroblasts (PHSFs) with the hormone Bradykinin (BK) releases calcium ( $\text{Ca}^{2+}$ ) from the endoplasmic reticulum (ER) via stimulation (+) of the inositol 1,4,5-trisphosphate ( $\text{InsP}_3$ )-activated  $\text{InsP}_3$ -receptor ( $\text{InsP}_3\text{R}$ ; *pathway I*). The released  $\text{Ca}^{2+}$  enters the mitochondrial matrix via MCU-mediated uptake (*pathway II*) and leaves this compartment again by the action of the mitochondrial sodium calcium exchanger (NCLX; *pathway III*). The latter is coupled to the action of the mitochondrial sodium hydrogen exchanger (NHX) and the mitochondrial electron transport chain (ETC). The ETC also sustains the inside-negative electrical potential ( $\Delta\psi$ ) across the mitochondrial inner membrane (MIM), which stimulates (+) MCU-mediated mitochondrial  $\text{Ca}^{2+}$  uptake. Within the mitochondrial matrix,  $\text{Ca}^{2+}$  stimulates the generation of ATP, which is exported to the cytosol by the Adenine nucleotide translocator (ANT) to fuel SERCA-mediated ER  $\text{Ca}^{2+}$  uptake (*pathway IV*). Alternatively,  $\text{Ca}^{2+}$  can be actively removed from the cytosol by PMCA action (*pathway V*). **Abbreviations:** ADP, adenosine diphosphate;  $[\text{ATP}]_m$ , free ATP concentration in the mitochondrion; BKR, Bradykinin receptor;  $[\text{Ca}^{2+}]_c$ , free  $\text{Ca}^{2+}$  concentration in the cytosol;  $[\text{Ca}^{2+}]_{\text{ER}}$ , free  $\text{Ca}^{2+}$  concentration in the ER;  $[\text{Ca}^{2+}]_m$ , free  $\text{Ca}^{2+}$  concentration in the mitochondrion; MCU, mitochondrial uniporter; PM, plasma membrane; SERCA, sarco/endoplasmic reticulum  $\text{Ca}^{2+}$ -ATPase; PMCA, plasma membrane  $\text{Ca}^{2+}$ -ATPase.

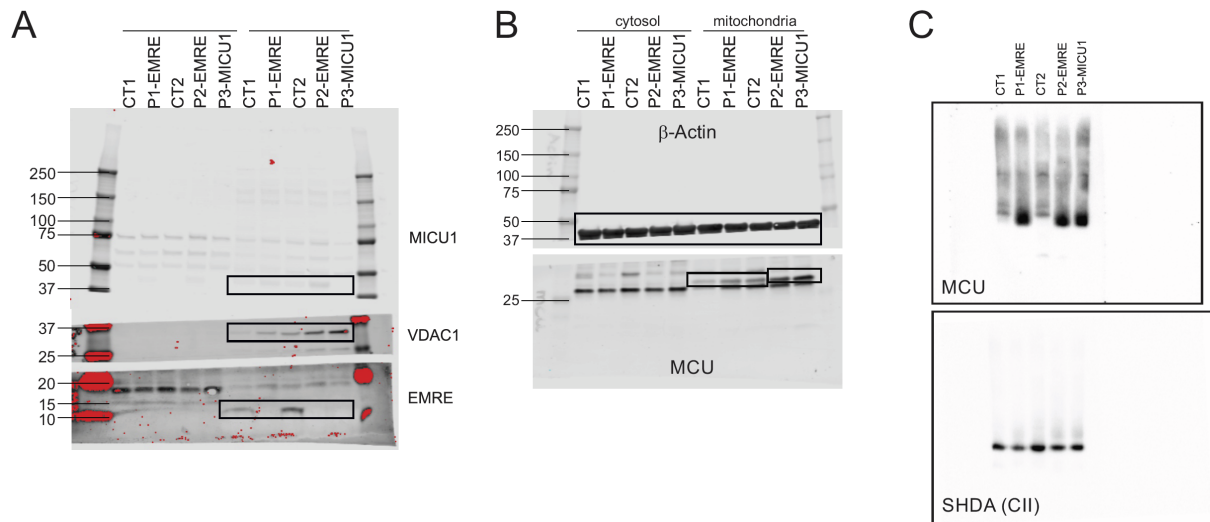

**Supplementary Figure 2: Original blots used for Figure 1.** Panel A and B were used to create **Fig. 1A**. Panel C was used to create **Fig. 1B**. numerals indicate molecular weight (MW) in kDa. Saturated pixels (markers) are depicted in red.

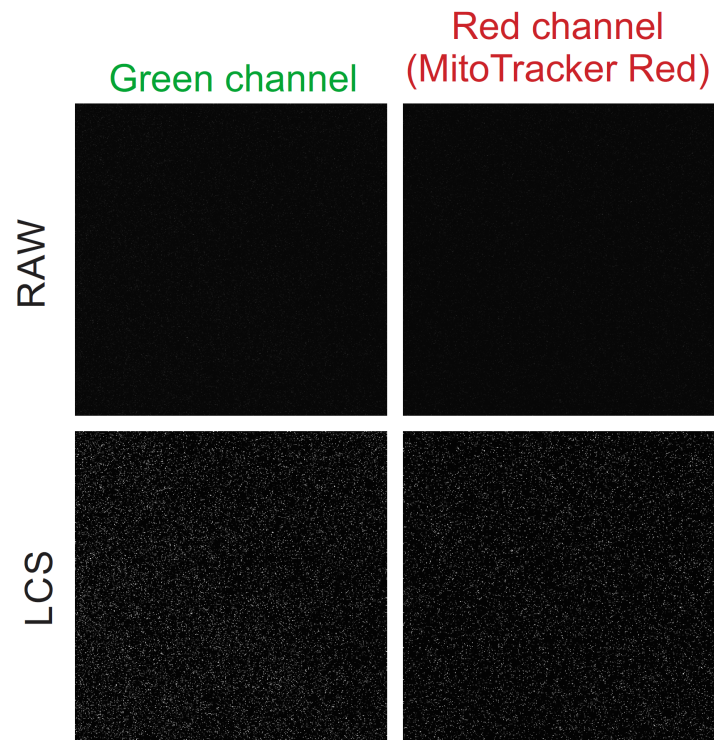

**Supplementary Figure 3A: Secondary antibody control for immunofluorescence.** Confocal microscopy images of CT2 cells. Cells were stained with anti-rabbit-Alexa-488 only in order to rule out the possibility of non-specific binding of the secondary antibody. Raw images are shown in the upper panel. Images in the lower panel were processed for visualization purposes by subsequent application of a linear contrast stretch (LCS) operation, a median filter (3x3; single pass) and a second LCS operation.



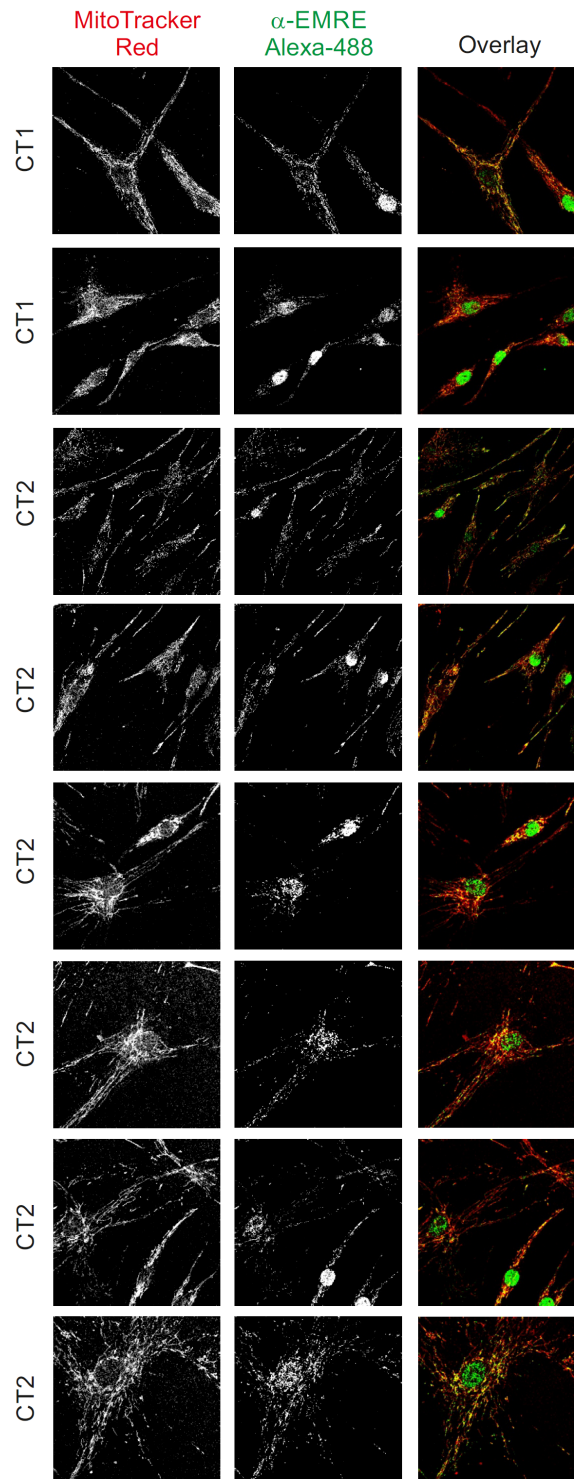

**Supplementary Figure 3B:** Additional confocal microscopy images of CT1 and CT2 cells co-stained with the mitochondrial marker MitoTracker Red (red) and anti-EMRE/Alexa-488 antibodies (green). Images were processed for visualization purposes by subsequent application of a linear contrast stretch (LCS) operation, a median filter (3x3; single pass) and a second LCS operation.

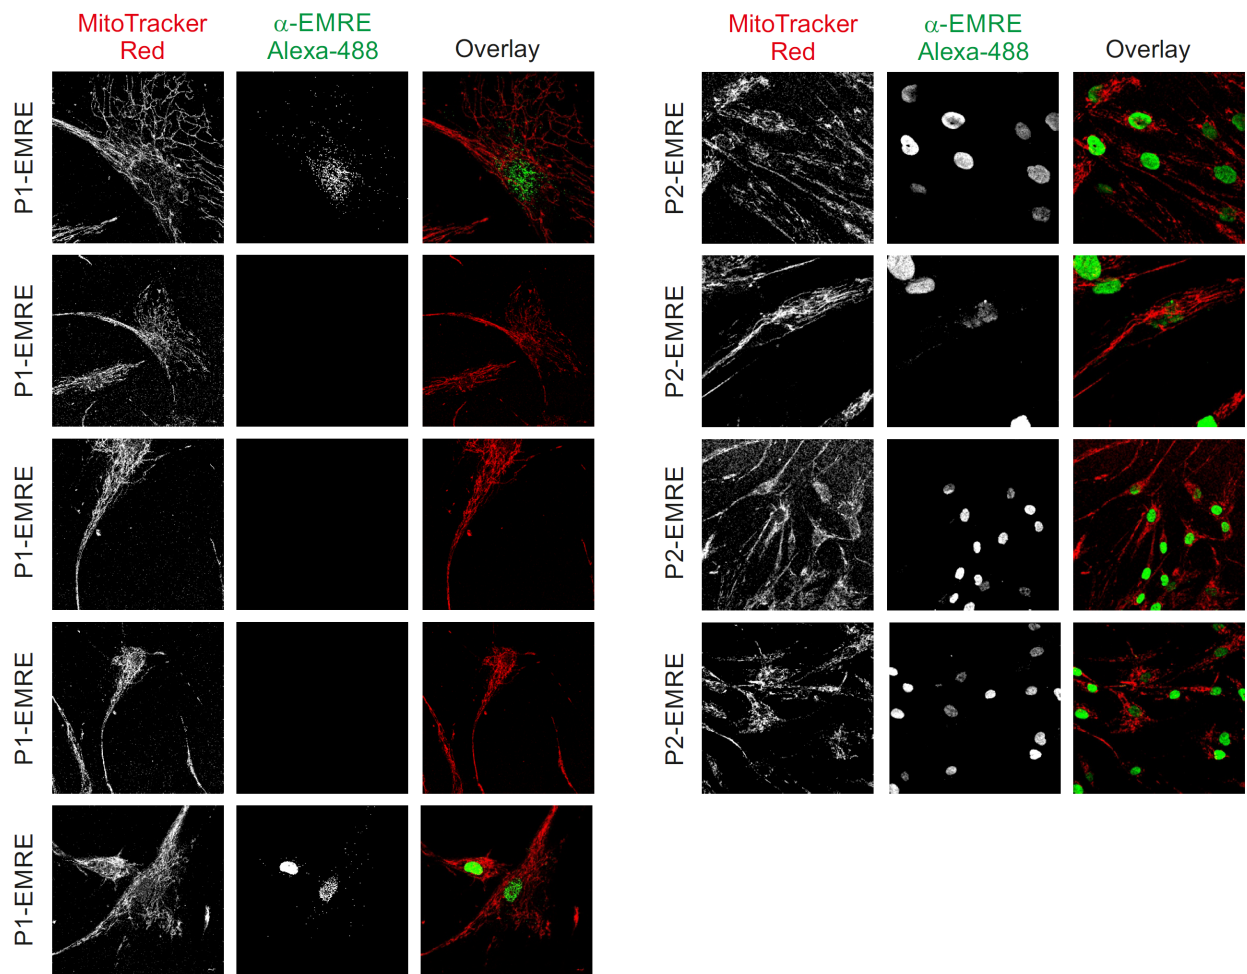

**Supplementary Figure 3C:** Additional confocal microscopy images of P1-EMRE and P2-EMRE cells co-stained with the mitochondrial marker MitoTracker Red (red) and anti-EMRE/Alexa-488 antibodies (green). Images were processed for visualization purposes by subsequent application of a linear contrast stretch (LCS) operation, a median filter (3x3; single pass) and a second LCS operation.

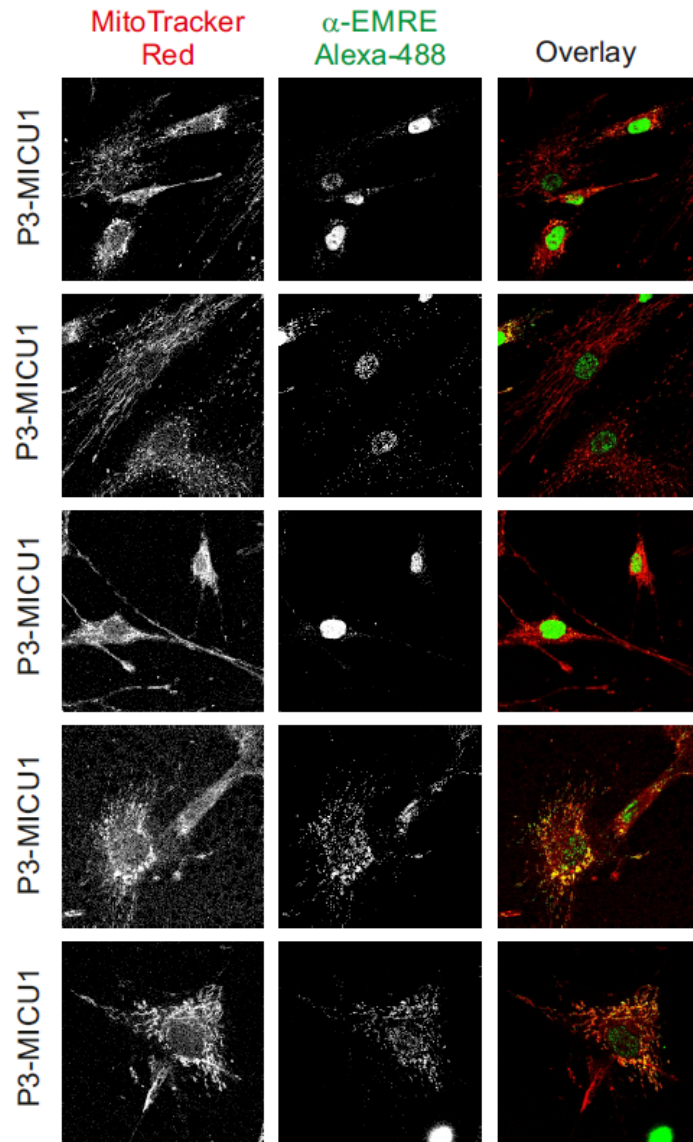

**Supplementary Figure 3D: EMRE antibody staining in P3-MICU1.** Additional confocal microscopy images of patient-derived PHSFs (P3-MICU1) co-stained with the mitochondrial marker MitoTracker Red (red) and anti-EMRE/Alexa-488 antibodies (green). Images were processed for visualization purposes by subsequent application of a linear contrast stretch (LCS) operation, a median filter (3x3; single pass) and a second LCS operation.

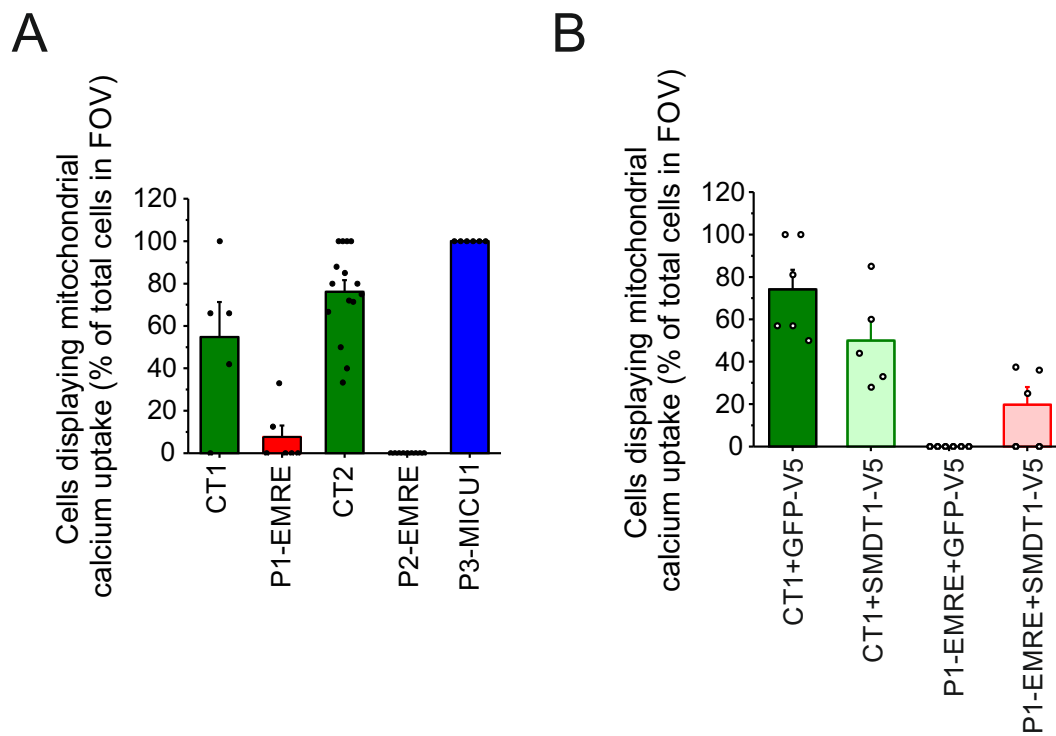

**Supplementary Figure 4: Second blinded analysis of the mitochondrial calcium uptake data.** (A) Scoring of BK-stimulated mitochondrial  $\text{Ca}^{2+}$  uptake data in Fig. 3B by a second researcher. Each symbol represents a field of view (FOV). For blinding purposes, here, the number of FOVs counted was 15 for CT2. (B) Same as panel A, but now for the data used in Fig. 4D.

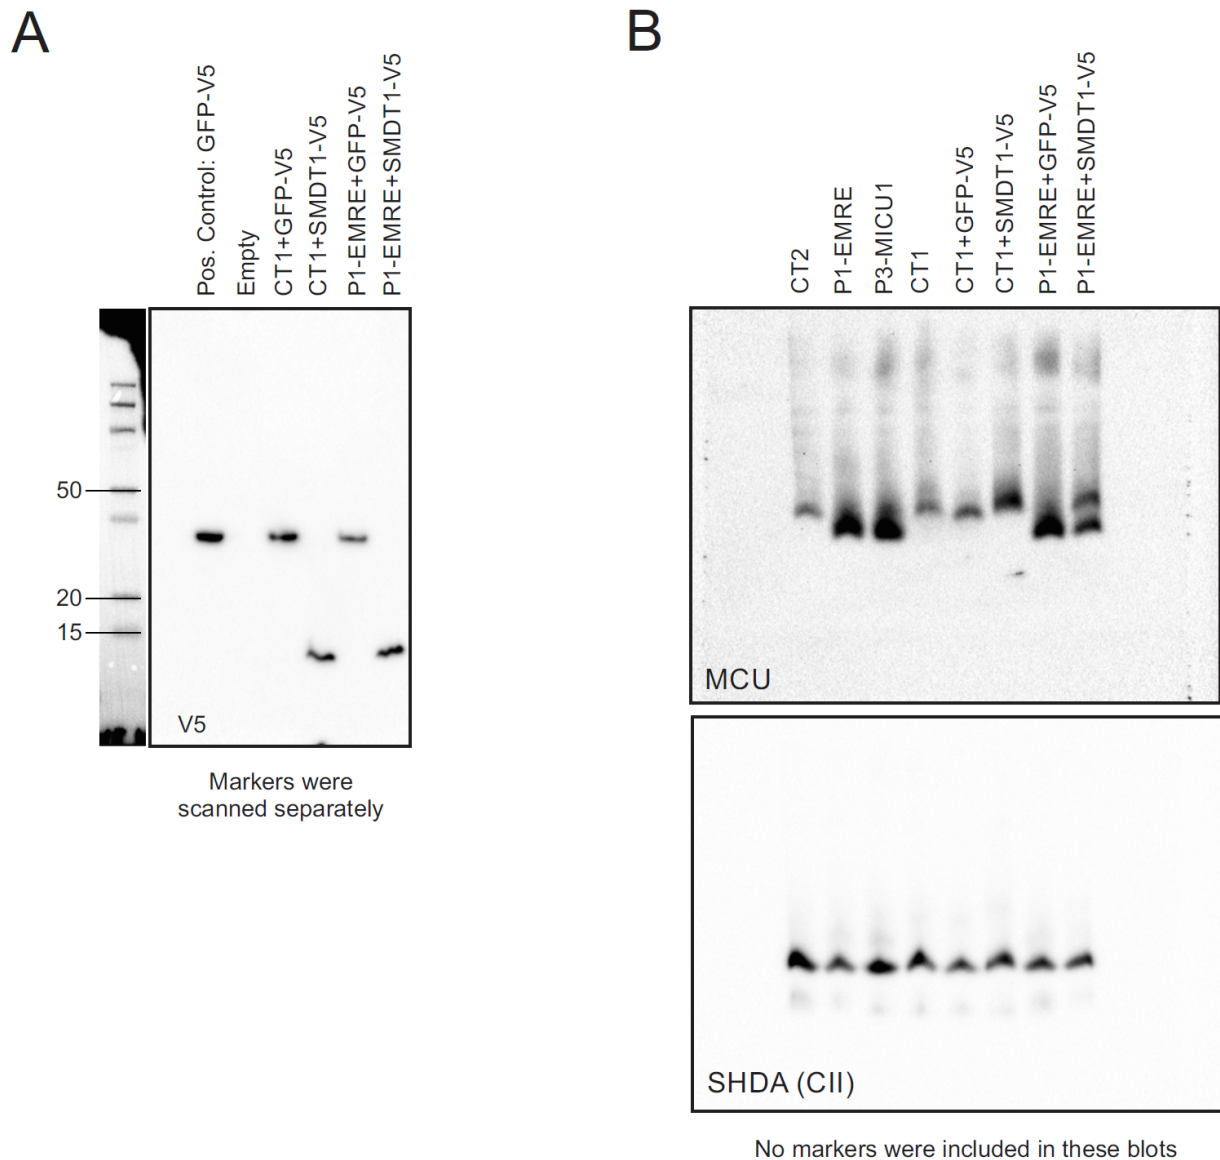

**Supplementary Figure 5: Original blots used for Figure 4.** (A) Data used for Fig. 4A. Numerals indicate molecular weight (MW) in kDa. (B) Data used for Fig. 4C (Lanes 5 to 8). For comparison some samples also used in Fig. 1A (CT1, CT2, P1-EMRE and P3-MICU1) were included in the analysis (lanes 1 to 4).

## MOVIES

**Supplementary movie 1: mitochondrial Ca<sup>2+</sup> uptake in CT1 cells.** Contrast-optimized (using ImagePro software) representative movie (created using Fiji) of CT1 cells loaded with fura-2 (3  $\mu\text{M}$ ; left) and rhod-2 (5  $\mu\text{M}$ ; right). The probes were alternately excited with 380 nm (fura-2) and 540 nm light (rhod-2) every 4 seconds. Bradykinin (1  $\mu\text{M}$ ) was added after ~25 cycles (104 sec). The focus was manually adjusted during the measurement to make sure that no out of focus mitochondrial rhod-2 signals were missed. The analysis strategy is explained in detail in the caption of **Figure 3A**.

**Supplementary movie 2: mitochondrial Ca<sup>2+</sup> uptake in P1-EMRE cells.** Contrast-optimized (using ImagePro software) representative movie (created using Fiji) of P1-EMRE cells loaded with fura-2 (3  $\mu\text{M}$ ; left) and rhod-2 (5  $\mu\text{M}$ ; right). The probes were alternately excited with 380 nm (fura-2) and 540 nm light (rhod-2) every 4 seconds. Bradykinin (1  $\mu\text{M}$ ) was added after ~25 cycles (104 sec). The focus was manually adjusted during the measurement to make sure that no out of focus mitochondrial rhod-2 signals were missed. The analysis strategy is explained in detail in the caption of **Figure 3A**.
